# Supplementary material for: Metabolic by-products of mosquito midgut bacteria, Enterobacter cloacae and Serratia marcescens, exhibit potent anti-parasitic effects on Plasmodium falciparum gametocytes in vitro
Source: Research Square preprint supplement (doi:10.21203/rs.3.rs-6176263/v1), 2025-03-12
Supplement: Supplementary file 1 [file 190288ac759267774f20abf6.xlsx]

## Sheet: Sheet1
Simultaneous Tests for General Linear Hypotheses
Multiple Comparisons of Means: Tukey Contrasts
Fit: aov(formula = p_sup~ bac * timepoint)
Linear Hypotheses:
	Estimate	Std.Error	t value	Pr(>|t|)
Entero - Ecoli == 0	41.612	4.84	8.598	<0.001
Serratia - Ecoli == 0	47.801	4.84	9.877	<0.001
Serratia - Entero == 0	6.189	3.952	1.566	0.295
time = 0.5
contrast	estimate	SE	df	t.ratio	p.value
Ecoli - Entero	-41.61	4.84	12	-8.598	<.0001
Ecoli - Serratia	-47.8	4.84	12	-9.877	<.0001
Entero - Serratia	-6.19	3.95	12	-1.566	0.297
time= 1
contrast	estimate	SE	df	t.ratio	p.value
Ecoli - Entero	-40.12	4.84	12	-8.289	<.0001
Ecoli - Serratia	-42.89	4.84	12	-8.862	<.0001
Entero - Serratia	-2.77	3.95	12	-0.702	0.767
time= 2
contrast	estimate	SE	df	t.ratio	p.value
Ecoli - Entero	-53.01	4.84	12	-10.953	<.0001
Ecoli - Serratia	-56.86	4.84	12	-11.749	<.0001
Entero - Serratia	-3.85	3.95	12	-0.975	0.6057
time= 4
contrast	estimate	SE	df	t.ratio	p.value
Ecoli - Entero	-50.77	4.84	12	-10.49	<.0001
Ecoli - Serratia	-60.28	4.84	12	-12.456	<.0001
Entero - Serratia	-9.52	3.95	12	-2.408	0.0785
time= 6
contrast	estimate	SE	df	t.ratio	p.value
Ecoli - Entero	-78.66	4.84	12	-16.252	<.0001
Ecoli - Serratia	-77.03	4.84	12	-15.915	<.0001
Entero - Serratia	1.63	3.95	12	0.412	0.9112
time= 12
contrast	estimate	SE	df	t.ratio	p.value
Ecoli - Entero	61.53	4.84	12	12.713	<.0001
Ecoli - Serratia	64.89	4.84	12	13.408	<.0001
Entero - Serratia	3.36	3.95	12	0.852	0.6795
