# Supplementary material for: Metabolic by-products of mosquito midgut bacteria, Enterobacter cloacae and Serratia marcescens, exhibit potent anti-parasitic effects on Plasmodium falciparum gametocytes in vitro
Source: Research Square preprint supplement (doi:10.21203/rs.3.rs-6176263/v1), 2025-03-12
Supplement: Supplementary file 2 [file bce00b5283b491560b03020a.xlsx]

## Sheet: Sheet1
Simultaneous Tests for General Linear Hypotheses
Multiple Comparisons of Means: Tukey Contrasts
Fit: aov(formula = p_sup ~ ttment * timepoint)
Linear Hypotheses:
	Estimate	Std. Error	t value	Pr(>|t|)
bb - lb	21.069	9.203	2.289	0.028
time (hours)	estimate	SE	df	t.ratio	p.value
0.5	-21.07	9.2	36	-2.289	0.028
1	-32.63	9.2	36	-3.545	0.0011
2	-12.63	9.2	36	-1.373	0.1783
4	-6.22	9.2	36	-0.676	0.5035
6	2.52	9.2	36	0.274	0.7858
12	24.89	9.2	36	2.705	0.0104
Call:
lm(formula = p_sup ~ ttment * time, data = lbbb)
Residuals:
Min	1Q	Median	3Q	Max
-62.549	-3.274	0.094	4.202	28.8
Coefficients:
	Estimate	Std. Error	t value	Pr(>|t|)
(Intercept)	81.976	6.507	12.598	9.28e-15	***
ttmentbb	21.069	9.203	2.289	0.028021	*
time1	-10.809	9.203	-1.175	0.247895
time2	5.281	9.203	0.574	0.569655
time4	12.691	9.203	1.379	0.176373
time6	24.129	9.203	2.622	0.012733	*
time12	-36.258	9.203	-3.94	0.000359	***
ttmentbb:time1	11.557	13.015	0.888	0.380415
ttmentbb:time2	-8.436	13.015	-0.648	0.520977
ttmentbb:time4	-14.851	13.015	-1.141	0.261366
ttmentbb:time6	-23.59	13.015	-1.813	0.078247	.
ttmentbb:time12	-45.963	13.015	-3.532	0.001152	**
