# Supplementary material for: Metabolic by-products of mosquito midgut bacteria, Enterobacter cloacae and Serratia marcescens, exhibit potent anti-parasitic effects on Plasmodium falciparum gametocytes in vitro
Source: Research Square preprint supplement (doi:10.21203/rs.3.rs-6176263/v1), 2025-03-12
Supplement: Supplementary file 3 [file e26f1b990e9cd38187039e08.xlsx]

## Sheet: Sheet1
	Model 1= (p_red ~ ttment * time * bac + strain)		Model 2= (p_red ~ ttment * time * bac)		Model 3= (p_red ~ ttment * time * bac + (1|strain))		Model 4= (p_red ~ ttment * time + (1|bac) + (1|strain))
Predictors	Estimates	p	Estimates	p	Estimates	p	Estimates	p
(Intercept)	73.18 ***	<0.001	78.88 ***	<0.001	78.88 ***	<0.001	81.98 ***	<0.001
ttment [heat]	-41.72 *	0.011	-41.72 *	0.014	-41.72 *	0.011	-39.04 ***	<0.001
ttment [pk]	20.53	0.195	20.53	0.211	20.53	0.195	17.14	0.102
time [1]	-9.10	0.562	-9.10	0.576	-9.10	0.562	-10.81	0.298
time [2]	6.45	0.681	6.45	0.692	6.45	0.681	5.28	0.61
time [4]	11.03	0.482	11.03	0.499	11.03	0.482	12.69	0.223
time [6]	28.04	0.08	28.04	0.091	28.04	0.08	24.13 *	0.023
time [12]	-31.48	0.051	-31.48	0.059	-31.48	0.051	-36.26 ***	0.001
bac [Serratia]	11.62	0.471	6.19	0.704	6.19	0.704
strain [EspG3]	11.39 *	0.035
strain [SmG5]	0.52	0.92
ttment [heat] × time [1]	7.14	0.747	7.14	0.756	7.14	0.747	16.83	0.253
ttment [pk] × time [1]	11.33	0.609	11.33	0.623	11.33	0.609	13.58	0.355
ttment [heat] × time [2]	15.20	0.493	15.20	0.509	15.20	0.493	18.41	0.212
ttment [pk] × time [2]	-4.52	0.838	-4.52	0.844	-4.52	0.838	-3.09	0.833
ttment [heat] × time [4]	-1.70	0.939	-1.70	0.941	-1.70	0.939	6.06	0.679
ttment [pk] × time [4]	-37.29	0.099	-37.29	0.111	-37.29	0.099	-25.65	0.084
ttment [heat] × time [6]	26.84	0.23	26.84	0.247	26.84	0.23	37.63 *	0.013
ttment [pk] × time [6]	-63.62 **	0.007	-63.62 **	0.008	-63.62 **	0.007	-43.48 **	0.004
ttment [heat] × time [12]	81.15 ***	0.001	81.15 **	0.001	81.15 ***	0.001	81.83 ***	<0.001
ttment [pk] × time [12]	30.87	0.169	30.87	0.184	30.87	0.169	35.67 *	0.018
ttment [heat] × bac	5.36	0.809	5.36	0.816	5.36	0.809
[Serratia]
ttment [pk] × bac	-6.78	0.759	-6.78	0.768	-6.78	0.759
[Serratia]
time [1] × bac [Serratia]	-3.42	0.877	-3.42	0.882	-3.42	0.877
time [2] × bac [Serratia]	-2.34	0.916	-2.34	0.919	-2.34	0.916
time [4] × bac [Serratia]	3.33	0.88	3.33	0.885	3.33	0.88
time [6] × bac [Serratia]	-7.82	0.724	-7.82	0.734	-7.82	0.724
time [12] × bac	-9.55	0.666	-9.55	0.678	-9.55	0.666
[Serratia]
(ttment [heat] × time	19.39	0.537	19.39	0.552	19.39	0.537
[1]) × bac [Serratia]
(ttment [pk] × time [1])	4.49	0.886	4.49	0.89	4.49	0.886
× bac [Serratia]
(ttment [heat] × time	6.42	0.838	6.42	0.843	6.42	0.838
[2]) × bac [Serratia]
(ttment [pk] × time [2])	2.85	0.927	2.85	0.93	2.85	0.927
× bac [Serratia]
(ttment [heat] × time	15.52	0.62	15.52	0.633	15.52	0.62
[4]) × bac [Serratia]
(ttment [pk] × time [4])	23.27	0.459	23.27	0.475	23.27	0.459
× bac [Serratia]
(ttment [heat] × time	21.57	0.492	21.57	0.508	21.57	0.492
[6]) × bac [Serratia]
(ttment [pk] × time [6])	40.28	0.203	40.28	0.22	40.28	0.203
× bac [Serratia]
(ttment [heat] × time	1.37	0.965	1.37	0.966	1.37	0.965
[12]) × bac [Serratia]
(ttment [pk] × time [12])	9.60	0.759	9.60	0.768	9.60	0.759
× bac [Serratia]
Random Effects
σ2= standard deviation					241.16		211.76
τ00= variance					19.13 strain		20.77 strain
							38.42 bac
ICC= Intraclass Correlation Coefficient					0.07		0.22
N= number of groups					4 strain		2 bac
							4 strain
Observations	72		72		72		72
R2 / R2 adjusted	0.811 / 0.606		0.784 / 0.575		0.648 / 0.674		0.605 / 0.692
AIC	623.259		628.871		402.368		513.656
* p<0.05 ** p<0.01 *** p<0.001
